# Supplementary material for: Reference Gene Selection for RT-qPCR Analysis in Maize Kernels Inoculated with Aspergillus flavus
Source: MDPI journal article supplement (doi:10.3390/toxins13060386), 2021-05-28
Supplement: s1 [file s1]

# Supplementary Materials: Reference Gene Selection for RT-qPCR Analysis in Maize Kernels Inoculated with *Aspergillus flavus*

Dafne Alves Oliveira, Juliet D. Tang and Marilyn L. Warburton

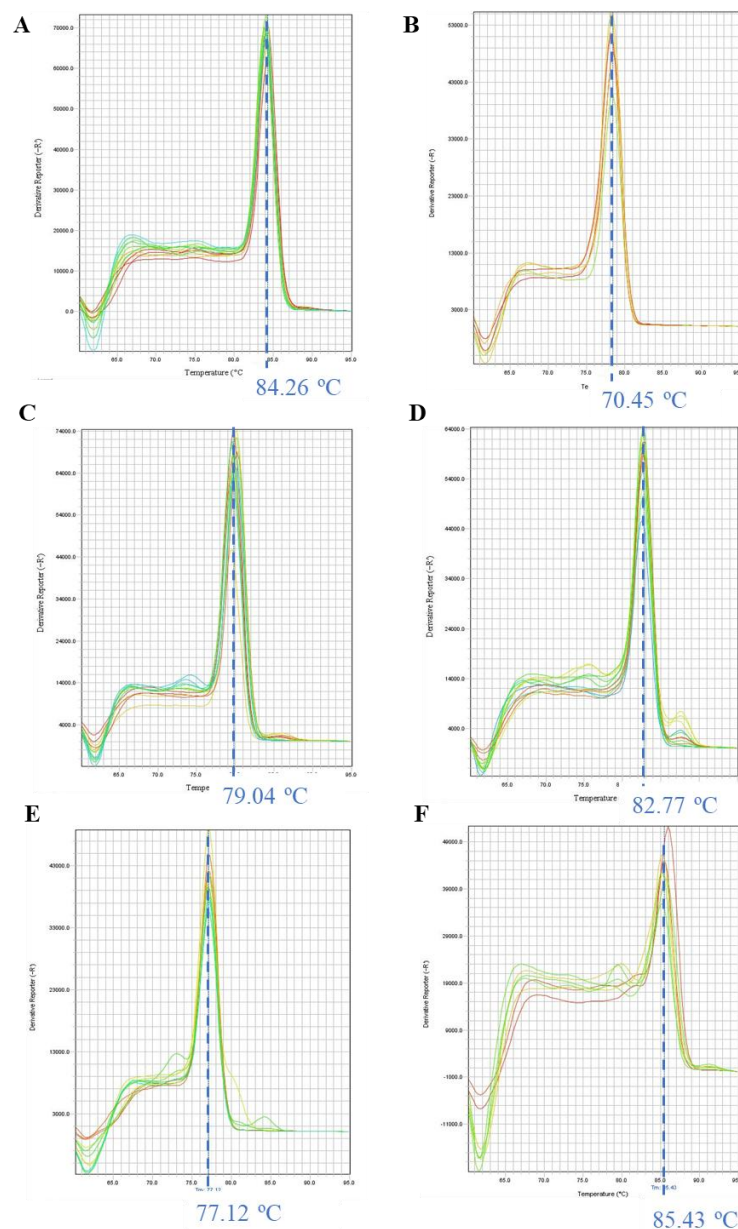

**Figure S1.** Melt curve for the candidate reference genes (A) *ACT1*, (B) *β-Tub2*, (C) *EFlα*, (D) *eIF4A2*, (E) *GAPDH* and (F) *TATA*.

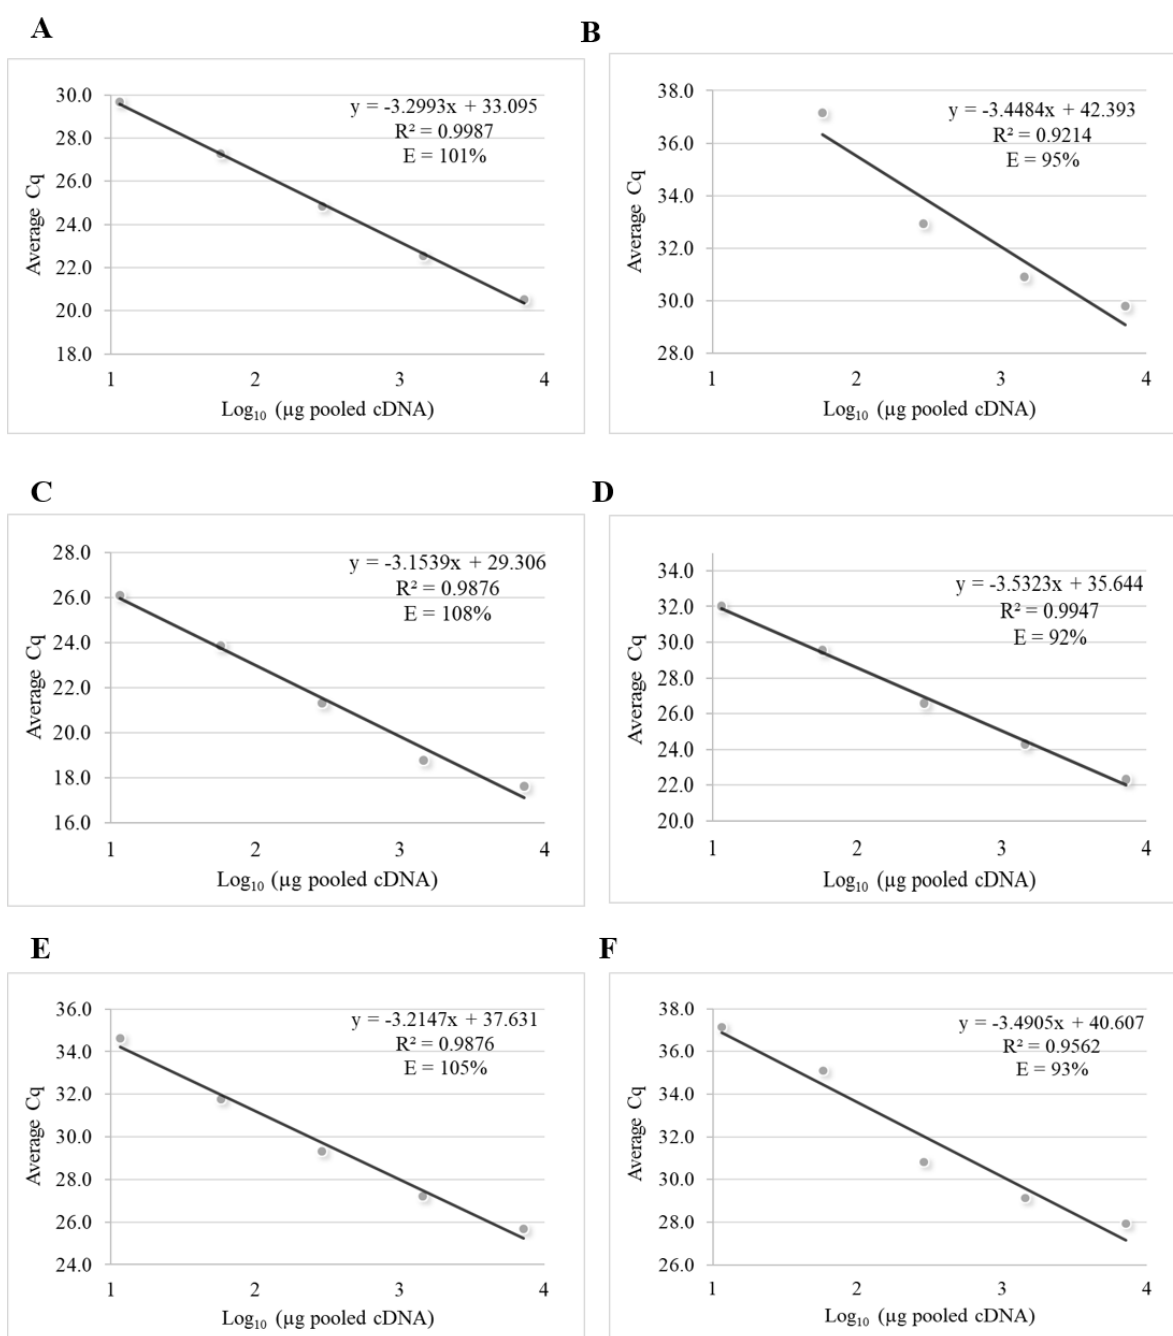

**Figure S2.** Standard curve to calculate amplification efficiency of candidate reference genes (A) *ACT1*, (B) *β-Tub2*, (C) *EFlα*, (D) *eIF4A2*, (E) *GAPDH* and (F) *TATA*.

**Table S1.** Primers characteristics for the gene of interest *Zm00001d020612* used to validate reference candidate genes.

| Gene Acc. No.         | Primer Sequence 5' → 3' (Forward/Reverse) | n-mer (bp) | TM (°C) | Size (bp) |
|-----------------------|-------------------------------------------|------------|---------|-----------|
| <i>Zm00001d020612</i> | GGTGACTTATGTTGCTCGTTTGAGACTGTTGC          | 32         | 62.0    | 264       |
|                       | AGCAAATGGGCCCGAAATATCAGAAGG               | 28         |         |           |
